# Supplementary material for: Kinetic and mechanistic insights into the degradation of clofibric acid in saline wastewater by Co2+/PMS process: a modeling and theoretical study
Source: Royal Society of Chemistry journal article supplement (doi:10.1039/d2ra02673b), 2022-01-01
Supplement: d2ra02673b1.pdf [file d2ra02673b1.pdf]

## Supplementary Information

### **Kinetic and mechanistic insights into the degradation of clofibric acid in saline wastewater by Co<sup>2+</sup>/PMS process: A modeling and theoretical study**

Jiale Wang<sup>1</sup>, Siyi Fan<sup>1</sup>, Zhirui Xu<sup>1</sup>, Jiaqi Gao<sup>1</sup>, Ying Huang<sup>1\*</sup>, Xubiao Yu<sup>1\*</sup>, Huihui Gan<sup>1</sup>

<sup>1</sup> *School of civil and environmental engineering, Ningbo University, Ningbo, 315211, PR China*

\*Corresponding authors.

E-mail addresses: huangyingdhu@163.com (Y. Huang); yuxubiao@nbu.edu.cn (X. Yu)

**Text S1** Identification of CA intermediates by GC-MS analysis.

Samples were pretreated by the solid phase extraction (SPE) method (with BOJIN<sup>®</sup> HLB SPE Column) and the silylation method (using pyridine hexamethyldisilazane and chlorotrimethylsilane). A gas chromatograph was equipped with an HB-5 MS capillary column (30 m × 250 μm × 0.25 μm film thickness). The column oven temperature was held at 60 °C for 3 min, ramp to 250 °C at a rate of 10 °C·min<sup>-1</sup>, then to 310 °C at 20 °C·min<sup>-1</sup>, and maintained for 13 min. Electron impact (EI) mode at 70 eV was used with a mass range scanned at 40-800 m/z. The intermediates were referred to the NIST08 mass spectral library database.

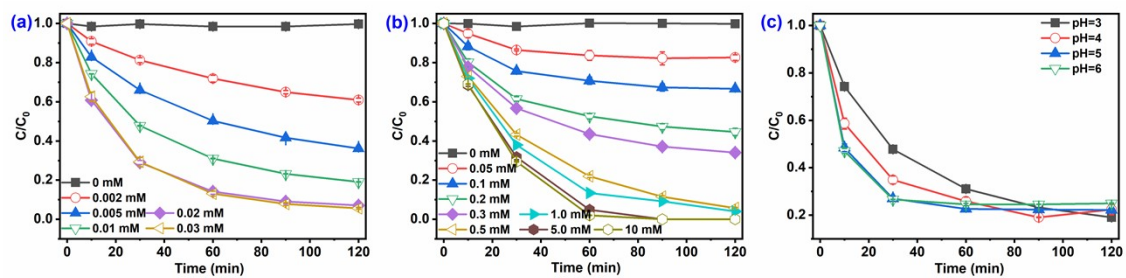

**Fig. S1** Effect of (a)  $Co^{2+}$  concentration, (b) PMS concentration and (c) pH on CA degradation. Experimental conditions.  $[CA]_0 = 0.1$  mM, (a, b) pH = 3.0, (a, c)  $[PMS]_0 = 0.5$  mM; (b, c)  $[Co^{2+}]_0 = 0.01$  mM.

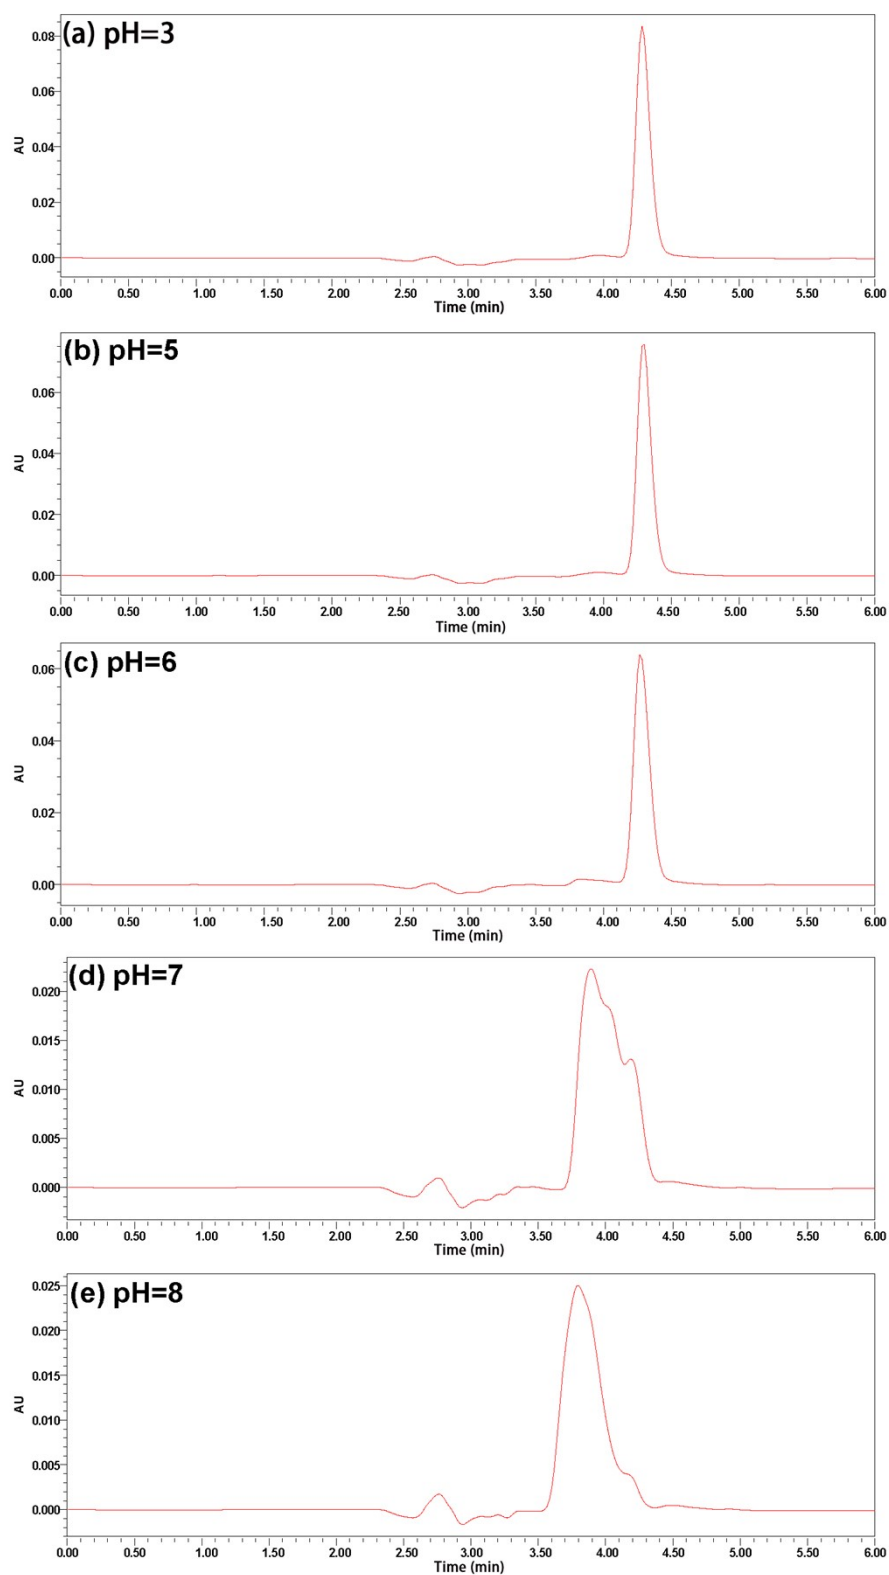

**Fig. S2** The HPLC chromatogram of CA under different pH conditions. Experimental conditions:  $[CA]_0 = 0.1 \text{ mM}$ ,  $[Co^{2+}]_0 = 0.01 \text{ mM}$ ,  $[PMS]_0 = 0.5 \text{ mM}$ .

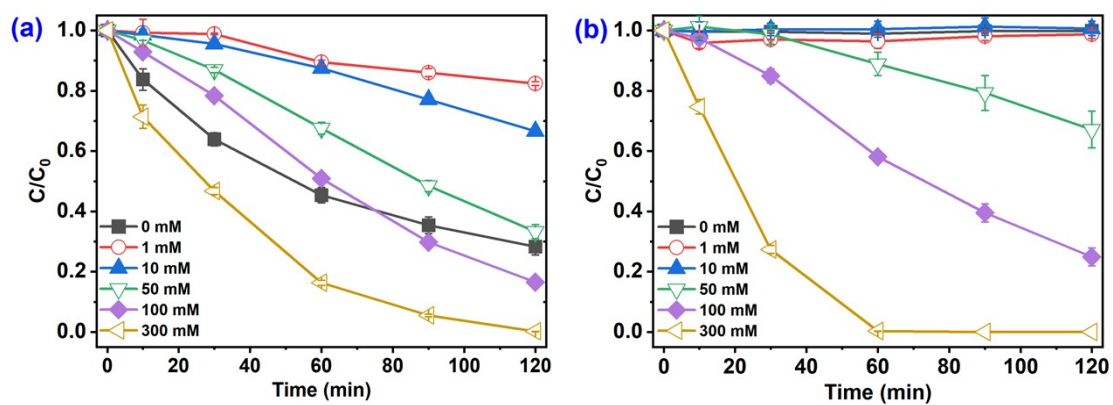

**Fig. S3** Effect of chloride ions concentration on CA degradation in the (a)  $\text{Co}^{2+}/\text{PMS}$  system and only (b) PMS process. Experimental conditions:  $[\text{CA}]_0 = 0.1 \text{ mM}$ ,  $[\text{Co}^{2+}]_0 = 0.01 \text{ mM}$ ,  $[\text{PMS}]_0 = 0.5 \text{ mM}$ , pH 3.0.

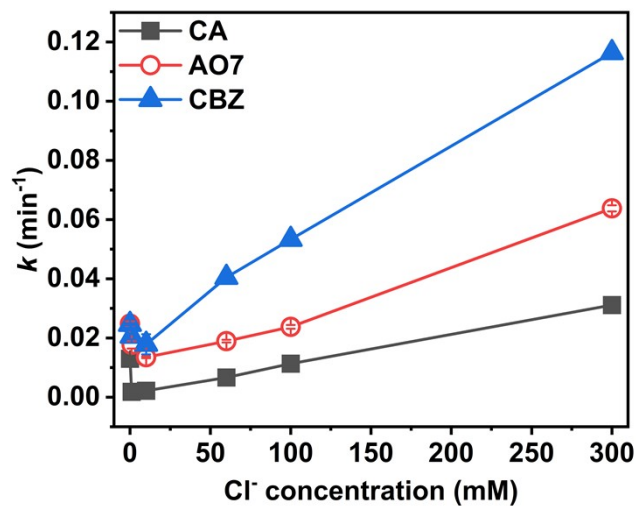

**Fig. S4** Effect of Cl<sup>-</sup> concentrations on the rate constant  $k$  of CA, AO7 and CBZ degradation in Co<sup>2+</sup>/PMS system. Experimental conditions:  $[CA]_0 = [AO7]_0 = [CBZ]_0 = 0.1$  mM,  $[Co^{2+}]_0 = 0.01$  mM,  $[PMS]_0 = 0.5$  mM, pH 3.0.

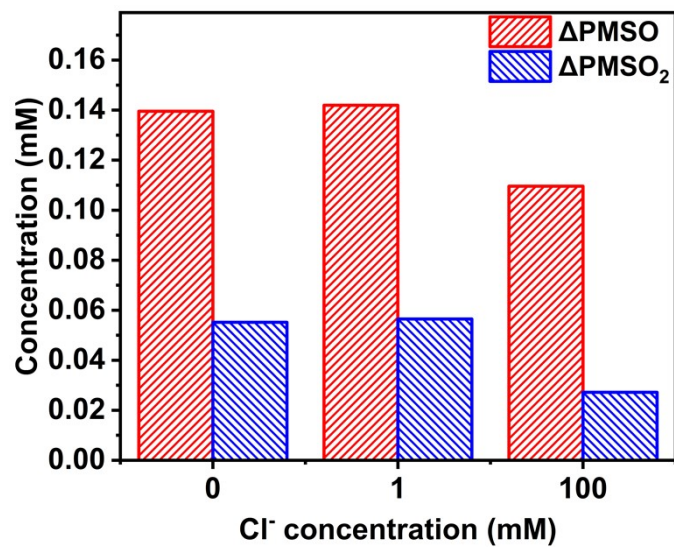

**Fig. S5** The further consumption of PMSO and the further formation of PMSO<sub>2</sub> in the Co<sup>2+</sup>PMS system under different Cl<sup>-</sup> concentrations. Experimental conditions: [CA]<sub>0</sub> = 0 mM, [PMS]<sub>0</sub> = 0.5 mM, pH 3.0.

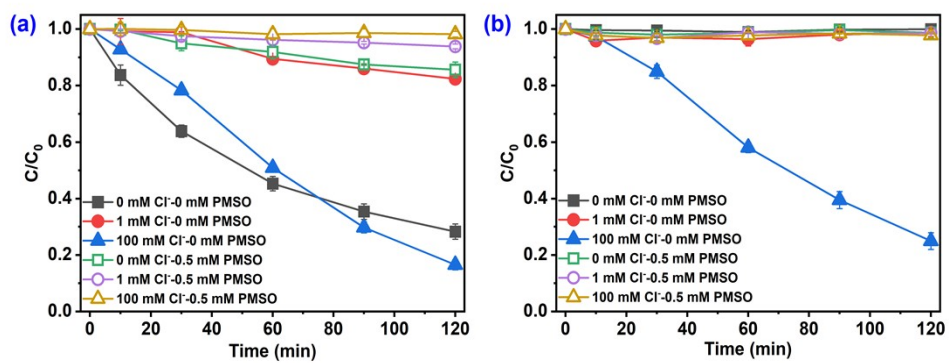

**Fig. S6** The degradation of CA in the (a) Co<sup>2+</sup>/PMS/Cl<sup>-</sup> and (b) PMS/Cl<sup>-</sup> system under different Cl<sup>-</sup> concentrations (0, 1 or 100 mM) and PMSO concentrations (0 or 0.5 mM).

Experimental conditions:  $[CA]_0 = 0.1$  mM,  $[PMS]_0 = 0.5$  mM, pH 3.0, (a)  $[Co^{2+}]_0 = 0.01$  mM, (b)  $[Co^{2+}]_0 = 0$  mM.



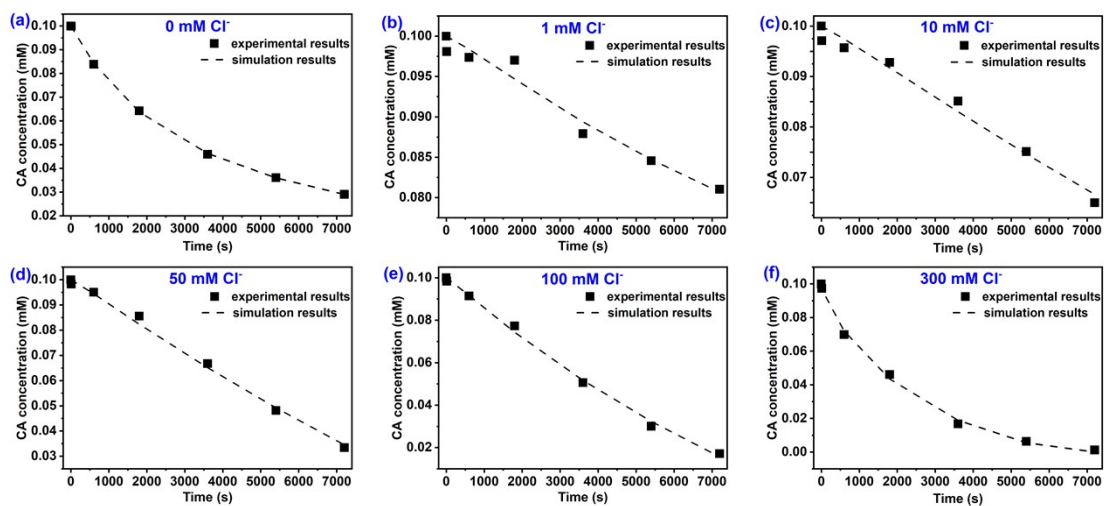

**Fig. S7** Model fits to data for oxidation of CA at different Cl<sup>-</sup> concentrations in the Co<sup>2+</sup>/PMS system (Data points represent the average from at least two experiments).

Experimental conditions: [CA]<sub>0</sub> = 0.1 mM, [Co<sup>2+</sup>]<sub>0</sub> = 0.01 mM, [PMS]<sub>0</sub> = 0.5 mM, pH

3.0.

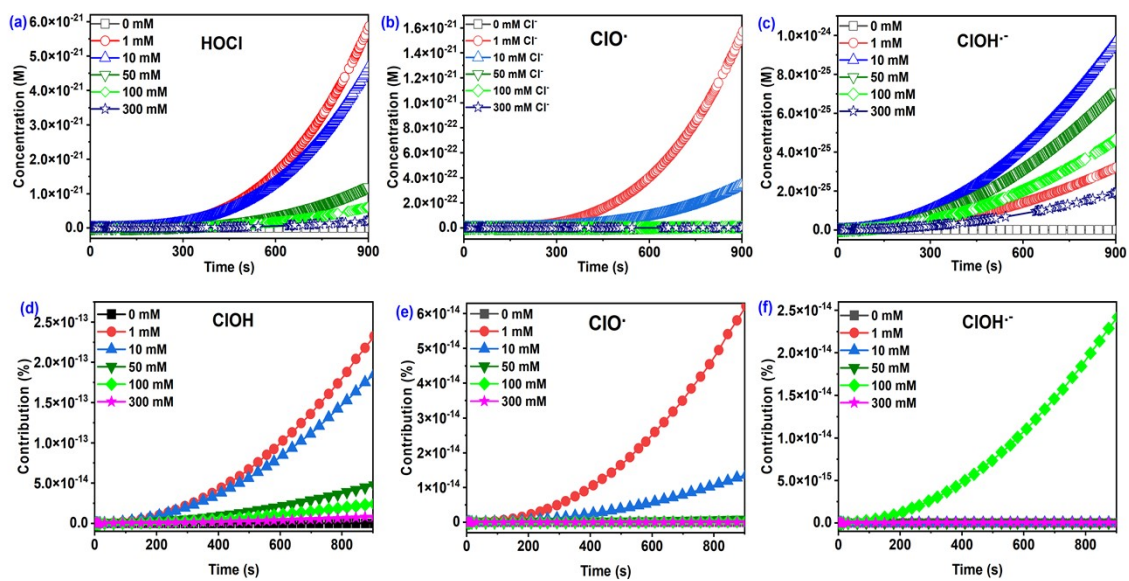

**Fig. S8** The (a-c) concentration and (d-f) contribution of reactive species at different  $\text{Cl}^-$  concentrations in the  $\text{Co}^{2+}/\text{PMS}/\text{Cl}^-$  system. Experimental conditions:  $[\text{CA}]_0 = 0.1 \text{ mM}$ ,  $[\text{Co}^{2+}]_0 = 0.01 \text{ mM}$ ,  $[\text{PMS}]_0 = 0.5 \text{ mM}$ ,  $\text{pH } 3.0$ .

**Table S1** The kinetic model for Co<sup>2+</sup>/PMS process.

| No. | Reaction                                                                                                        | Rate Constant                                     | Reference     |
|-----|-----------------------------------------------------------------------------------------------------------------|---------------------------------------------------|---------------|
| 1   | $\text{Co}^{2+} + \text{HSO}_5^- \rightarrow \text{Co}^{3+} + \text{SO}_4^{\cdot-} + \text{OH}^-$               | $4.72 \times 10^{-1} \text{ M}^{-1}\text{s}^{-1}$ | <i>fitted</i> |
| 2   | $\text{Co}^{2+} + \text{SO}_4^{\cdot-} \rightarrow \text{Co}^{3+} + \text{SO}_4^{2-}$                           | $2.0 \times 10^6 \text{ M}^{-1}\text{s}^{-1}$     | 1             |
| 3   | $\text{SO}_4^{\cdot-} + \text{SO}_4^{\cdot-} \rightarrow \text{S}_2\text{O}_8^{2-}$                             | $4.0 \times 10^8 \text{ M}^{-1}\text{s}^{-1}$     | 2             |
| 4   | $\text{SO}_4^{\cdot-} + \text{HSO}_5^- \rightarrow \text{SO}_5^{\cdot-} + \text{HSO}_4^-$                       | $1.0 \times 10^5 \text{ M}^{-1}\text{s}^{-1}$     | 3             |
| 5   | $\text{SO}_4^{\cdot-} + \text{S}_2\text{O}_8^{2-} \rightarrow \text{SO}_4^{2-} + \text{S}_2\text{O}_8^{\cdot-}$ | $6.1 \times 10^5 \text{ M}^{-1}\text{s}^{-1}$     | 3             |
| 6   | $\text{SO}_4^{\cdot-} + \text{H}_2\text{O} \rightarrow \text{HSO}_4^- + \cdot\text{OH}$                         | $5.0 \times 10^2 \text{ M}^{-1}\text{s}^{-1}$     | 2             |
| 7   | $\text{Co}^{3+} + \text{HSO}_5^- \rightarrow \text{Co}^{2+} + \text{SO}_5^{\cdot-} + \text{H}^+$                | $1.94 \text{ M}^{-1}\text{s}^{-1}$                | <i>fitted</i> |
| 8   | $2\text{SO}_5^{\cdot-} \rightarrow 2\text{SO}_4^{\cdot-} + \text{O}_2$                                          | $1.0 \times 10^8 \text{ M}^{-1}\text{s}^{-1}$     | 2             |
| 9   | $\text{HSO}_4^- + \cdot\text{OH} \rightarrow \text{SO}_4^{\cdot-} + \text{H}_2\text{O}$                         | $6.9 \times 10^5 \text{ M}^{-1}\text{s}^{-1}$     | 2             |
| 10  | $\text{HSO}_4^- \rightarrow \text{SO}_4^{2-} + \text{H}^+$                                                      | $1.2 \times 10^{-2} \text{ M}^{-1}\text{s}^{-1}$  | 2             |
| 11  | $\text{HSO}_5^- \rightarrow \text{SO}_5^{2-} + \text{H}^+$                                                      | $1.0 \times 10^{-5} \text{ M}^{-1}\text{s}^{-1}$  | 2             |
| 12  | $\text{H}_2\text{O} \rightarrow \text{H}^+ + \text{OH}^-$                                                       | $1.0 \times 10^{-3} \text{ M}^{-1}\text{s}^{-1}$  | 4             |
| 13  | $\text{H}^+ + \text{OH}^- \rightarrow \text{H}_2\text{O}$                                                       | $1.0 \times 10^{11} \text{ M}^{-1}\text{s}^{-1}$  | 4             |
| 14  | $\text{SO}_4^{\cdot-} + \text{OH}^- \rightarrow \cdot\text{OH} + \text{SO}_4^{2-}$                              | $6.5 \times 10^7 \text{ M}^{-1}\text{s}^{-1}$     | 2             |
| 15  | $\cdot\text{OH} + \cdot\text{OH} \rightarrow \text{H}_2\text{O}_2$                                              | $5.2 \times 10^9 \text{ M}^{-1}\text{s}^{-1}$     | 4             |
| 16  | $\cdot\text{OH} + \text{SO}_4^{\cdot-} \rightarrow \text{HSO}_5^-$                                              | $1.0 \times 10^{10} \text{ M}^{-1}\text{s}^{-1}$  | 2             |
| 17  | $\cdot\text{OH} + \text{H}_2\text{O}_2 \rightarrow \text{HO}_2^{\cdot} + \text{H}_2\text{O}$                    | $2.7 \times 10^7 \text{ M}^{-1}\text{s}^{-1}$     | 2             |

|    |                                                                                              |                                                   |               |
|----|----------------------------------------------------------------------------------------------|---------------------------------------------------|---------------|
| 18 | $\text{HO}_2\cdot + \text{HO}_2\cdot \rightarrow \text{H}_2\text{O}_2 + \text{O}_2$          | $8.3 \times 10^5 \text{ M}^{-1}\text{s}^{-1}$     | 5             |
| 19 | $\text{HO}_2\cdot \rightarrow \text{O}_2\cdot^- + \text{H}^+$                                | $7.0 \times 10^5 \text{ M}^{-1}\text{s}^{-1}$     | 6             |
| 20 | $\text{H}_2\text{O}_2 \rightarrow \text{HO}_2^- + \text{H}^+$                                | $1.3 \times 10^{-1} \text{ M}^{-1}\text{s}^{-1}$  | 4             |
| 21 | $\text{HO}_2^- + \text{H}^+ \rightarrow \text{H}_2\text{O}_2$                                | $5.0 \times 10^{10} \text{ M}^{-1}\text{s}^{-1}$  | 4             |
| 22 | $\text{Co}^{2+} + \text{HSO}_5^- \rightarrow \text{SO}_4^{2-} + \text{H}^+ + \text{Co}^{4+}$ | $1.85 \times 10^{-1} \text{ M}^{-1}\text{s}^{-1}$ | <i>fitted</i> |
| 23 | $\text{O}_2\cdot^- + \text{H}^+ \rightarrow \text{HO}_2\cdot$                                | $5.0 \times 10^{10} \text{ M}^{-1}\text{s}^{-1}$  | 4             |
| 24 | $\text{HO}_2\cdot + \text{O}_2\cdot^- \rightarrow \text{HO}_2^- + \text{O}_2$                | $9.7 \times 10^7 \text{ M}^{-1}\text{s}^{-1}$     | 4             |
| 25 | $\cdot\text{OH} + \text{HO}_2\cdot \rightarrow \text{H}_2\text{O} + \text{O}_2$              | $7.1 \times 10^9 \text{ M}^{-1}\text{s}^{-1}$     | 4             |
| 26 | $\cdot\text{OH} + \text{O}_2\cdot^- \rightarrow \text{OH}^- + \text{O}_2$                    | $1.0 \times 10^{10} \text{ M}^{-1}\text{s}^{-1}$  | 4             |
| 27 | $\cdot\text{OH} + \text{HO}_2^- \rightarrow \text{H}_2\text{O} + \text{O}_2\cdot^-$          | $7.5 \times 10^9 \text{ M}^{-1}\text{s}^{-1}$     | 2             |
| 28 | $\cdot\text{OH} + \text{HSO}_5^- \rightarrow \text{SO}_5\cdot^- + \text{H}_2\text{O}$        | $1.7 \times 10^7 \text{ M}^{-1}\text{s}^{-1}$     | 2             |
| 29 | $\cdot\text{OH} + \text{SO}_4^{2-} \rightarrow \text{SO}_4\cdot^- + \text{OH}^-$             | $1.2 \times 10^6 \text{ M}^{-1}\text{s}^{-1}$     | 2             |
| 30 | $\text{SO}_4\cdot^- + \text{Cl}^- \rightarrow \text{SO}_4^{2-} + \text{Cl}\cdot$             | $2.7 \times 10^8 \text{ M}^{-1}\text{s}^{-1}$     | 7             |
| 31 | $\text{Cl}\cdot + \cdot\text{OH} \rightarrow \text{HOCl}\cdot$                               | $4.3 \times 10^9 \text{ M}^{-1}\text{s}^{-1}$     | 4             |
| 32 | $\text{HOCl}\cdot + \text{Cl}^- \rightarrow \text{Cl}_2\cdot^- + \text{OH}^-$                | $1.0 \times 10^5 \text{ M}^{-1}\text{s}^{-1}$     | 4             |
| 33 | $\text{H}^+ + \text{Cl}\cdot \rightarrow \text{HCl}$                                         | $5.0 \times 10^{10} \text{ M}^{-1}\text{s}^{-1}$  | 4             |
| 34 | $\text{HCl} \rightarrow \text{H}^+ + \text{Cl}\cdot$                                         | $8.6 \times 10^{16} \text{ s}^{-1}$               | 4             |
| 35 | $\text{HOCl}\cdot \rightarrow \text{Cl}\cdot + \cdot\text{OH}$                               | $6.1 \times 10^9 \text{ s}^{-1}$                  | 4             |
| 36 | $\text{HOCl}\cdot + \text{H}^+ \rightarrow \text{Cl}\cdot + \text{H}_2\text{O}$              | $2.1 \times 10^{10} \text{ M}^{-1}\text{s}^{-1}$  | 4             |

|    |                                                                                                          |                                                  |   |
|----|----------------------------------------------------------------------------------------------------------|--------------------------------------------------|---|
| 37 | $\text{Cl}^\cdot + \text{Cl}^\cdot \rightarrow \text{Cl}_2^\cdot$                                        | $6.5 \times 10^9 \text{ M}^{-1}\text{s}^{-1}$    | 4 |
| 38 | $\text{Cl}^\cdot + \text{Cl}_2 \rightarrow \text{Cl}_3^\cdot$                                            | $2.0 \times 10^4 \text{ M}^{-1}\text{s}^{-1}$    | 4 |
| 39 | $\text{Cl}^\cdot + \text{HOCl} \rightarrow \text{Cl}_2\text{OH}^\cdot$                                   | $1.5 \times 10^4 \text{ M}^{-1}\text{s}^{-1}$    | 4 |
| 40 | $\text{Cl}^\cdot + \text{H}_2\text{O}_2 \rightarrow \text{HCl} + \text{HO}_2^\cdot$                      | $4.0 \times 10^9 \text{ M}^{-1}\text{s}^{-1}$    | 4 |
| 41 | $\text{Cl}^\cdot + \text{OH}^- \rightarrow \text{HOCl}^\cdot$                                            | $4.3 \times 10^9 \text{ M}^{-1}\text{s}^{-1}$    | 4 |
| 42 | $\text{Cl}^\cdot + \text{Cl}^\cdot \rightarrow \text{Cl}_2$                                              | $1.0 \times 10^8 \text{ M}^{-1}\text{s}^{-1}$    | 4 |
| 43 | $\text{Cl}^\cdot + \text{H}_2\text{O} \rightarrow \text{HClOH}$                                          | $2.5 \times 10^5 \text{ M}^{-1}\text{s}^{-1}$    | 4 |
| 44 | $\text{Cl}^\cdot + \text{H}_2\text{O} \rightarrow \text{HOCl}^\cdot + \text{H}^+$                        | $1.6 \times 10^5 \text{ M}^{-1}\text{s}^{-1}$    | 4 |
| 45 | $\text{Cl}_2^\cdot + \text{O}_2^\cdot \rightarrow 2\text{Cl}^\cdot + \text{O}_2$                         | $1.0 \times 10^9 \text{ M}^{-1}\text{s}^{-1}$    | 4 |
| 46 | $\text{Cl}_2^\cdot + \text{OH}^- \rightarrow \text{HOCl}^\cdot + \text{Cl}^-$                            | $4.5 \times 10^7 \text{ M}^{-1}\text{s}^{-1}$    | 4 |
| 47 | $\text{Cl}_2^\cdot \rightarrow \text{Cl}^\cdot + \text{Cl}^-$                                            | $1.1 \times 10^5 \text{ s}^{-1}$                 | 4 |
| 48 | $\text{Cl}_2^\cdot + \text{Cl}_2^\cdot \rightarrow \text{Cl}_2 + 2\text{Cl}^\cdot$                       | $8.3 \times 10^8 \text{ M}^{-1}\text{s}^{-1}$    | 4 |
| 49 | $\text{Cl}_2^\cdot + \text{H}_2\text{O}_2 \rightarrow 2\text{Cl}^\cdot + \text{HO}_2^\cdot + \text{H}^+$ | $1.4 \times 10^5 \text{ M}^{-1}\text{s}^{-1}$    | 4 |
| 50 | $\text{Cl}_2^\cdot + \text{H}_2\text{O} \rightarrow \text{HClOH} + \text{Cl}^-$                          | $1.3 \times 10^3 \text{ M}^{-1}\text{s}^{-1}$    | 4 |
| 51 | $\text{Cl}_2^\cdot + \cdot\text{OH} \rightarrow \text{HOCl} + \text{Cl}^-$                               | $1.0 \times 10^9 \text{ M}^{-1}\text{s}^{-1}$    | 4 |
| 52 | $\text{HOCl} \rightarrow \text{H}^+ + \text{ClO}^-$                                                      | $1.6 \times 10^3 \text{ s}^{-1}$                 | 4 |
| 53 | $\text{H}^+ + \text{ClO}^- \rightarrow \text{HOCl}$                                                      | $5.0 \times 10^{10} \text{ M}^{-1}\text{s}^{-1}$ | 4 |
| 54 | $\text{HClOH} \rightarrow \text{HOCl}^\cdot + \text{H}^+$                                                | $1.0 \times 10^8 \text{ s}^{-1}$                 | 4 |
| 55 | $\text{HClOH} \rightarrow \text{Cl}^\cdot + \text{H}_2\text{O}$                                          | $1.0 \times 10^2 \text{ s}^{-1}$                 | 4 |

|    |                                                                                                                          |                                                  |   |
|----|--------------------------------------------------------------------------------------------------------------------------|--------------------------------------------------|---|
| 56 | $\text{HClOH} + \text{Cl}^- \rightarrow \text{Cl}_2^{\cdot-} + \text{H}_2\text{O}$                                       | $5.0 \times 10^9 \text{ M}^{-1}\text{s}^{-1}$    | 4 |
| 57 | $\text{Cl}_3^- + \text{HO}_2^{\cdot} \rightarrow \text{Cl}_2^{\cdot-} + \text{HCl} + \text{O}_2$                         | $1.0 \times 10^9 \text{ M}^{-1}\text{s}^{-1}$    | 4 |
| 58 | $\text{Cl}_3^- + \text{O}_2^{\cdot-} \rightarrow \text{Cl}_2^{\cdot-} + \text{Cl}^- + \text{O}_2$                        | $3.8 \times 10^9 \text{ M}^{-1}\text{s}^{-1}$    | 4 |
| 59 | $\text{Cl}_3^- \rightarrow \text{Cl}_2 + \text{Cl}^-$                                                                    | $1.1 \times 10^5 \text{ s}^{-1}$                 | 4 |
| 60 | $\text{Cl}_2 + \text{O}_2^{\cdot-} \rightarrow \text{Cl}_2^{\cdot-} + \text{O}_2$                                        | $1.0 \times 10^9 \text{ M}^{-1}\text{s}^{-1}$    | 4 |
| 61 | $\text{Cl}_2 + \text{HO}_2^{\cdot} \rightarrow \text{Cl}_2^{\cdot-} + \text{H}^+ + \text{O}_2$                           | $1.0 \times 10^9 \text{ M}^{-1}\text{s}^{-1}$    | 4 |
| 62 | $\text{Cl}_2 + \text{H}_2\text{O} \rightarrow \text{Cl}_2\text{OH}^- + \text{H}^+$                                       | $1.5 \times 10^1 \text{ M}^{-1}\text{s}^{-1}$    | 4 |
| 63 | $\text{Cl}_2 + \text{H}_2\text{O}_2 \rightarrow 2\text{HCl} + \text{O}_2$                                                | $1.3 \times 10^4 \text{ M}^{-1}\text{s}^{-1}$    | 4 |
| 64 | $\text{Cl}_2\text{OH}^- + \text{H}^+ \rightarrow \text{Cl}_2 + \text{H}_2\text{O}$                                       | $2.0 \times 10^{10} \text{ M}^{-1}\text{s}^{-1}$ | 4 |
| 65 | $\text{Cl}_2\text{OH}^- \rightarrow \text{HOCl} + \text{Cl}^-$                                                           | $5.5 \times 10^9 \text{ s}^{-1}$                 | 4 |
| 66 | $\text{HOCl} + \cdot\text{OH} \rightarrow \text{ClO}^{\cdot} + \text{H}_2\text{O}$                                       | $2.0 \times 10^9 \text{ M}^{-1}\text{s}^{-1}$    | 4 |
| 67 | $\text{HOCl} + \text{O}_2^{\cdot-} \rightarrow \text{Cl}^{\cdot} + \text{OH}^- + \text{O}_2$                             | $7.5 \times 10^6 \text{ M}^{-1}\text{s}^{-1}$    | 4 |
| 68 | $\text{HOCl} + \text{HO}_2^{\cdot} \rightarrow \text{Cl}^{\cdot} + \text{H}_2\text{O} + \text{O}_2$                      | $7.5 \times 10^6 \text{ M}^{-1}\text{s}^{-1}$    | 4 |
| 69 | $\text{HOCl} + \text{H}_2\text{O}_2 \rightarrow \text{HCl} + \text{H}_2\text{O} + \text{O}_2$                            | $1.1 \times 10^4 \text{ M}^{-1}\text{s}^{-1}$    | 4 |
| 70 | $\text{ClO}^- + \cdot\text{OH} \rightarrow \text{ClO}^{\cdot} + \text{OH}^-$                                             | $8.8 \times 10^9 \text{ M}^{-1}\text{s}^{-1}$    | 4 |
| 71 | $\text{ClO}^- + \text{H}_2\text{O}_2 \rightarrow \text{Cl}^- + \text{H}_2\text{O} + \text{O}_2$                          | $1.7 \times 10^5 \text{ M}^{-1}\text{s}^{-1}$    | 4 |
| 72 | $\text{ClO}^- + \text{O}_2^{\cdot-} + \text{H}_2\text{O} \rightarrow \text{Cl}^{\cdot} + 2\text{OH}^- +$<br>$\text{O}_2$ | $2.0 \times 10^8 \text{ M}^{-1}\text{s}^{-1}$    | 4 |
| 73 | $\text{Cl}_2^{\cdot-} + \text{HO}_2^{\cdot} \rightarrow 2\text{Cl}^- + \text{H}^+ + \text{O}_2$                          | $3.0 \times 10^9 \text{ M}^{-1}\text{s}^{-1}$    | 4 |

---

|    |                                                                                                                 |                                                   |        |
|----|-----------------------------------------------------------------------------------------------------------------|---------------------------------------------------|--------|
| 74 | $\text{Cl}_2 + \text{H}_2\text{O} \rightarrow \text{HOCl} + \text{H}^+ + \text{Cl}^-$                           | $1.0 \times 10^{-3} \text{ M}^{-1}\text{s}^{-1}$  | 4      |
| 75 | $\text{SO}_4^{2-} + \text{Cl}^\bullet \rightarrow \text{SO}_4^{\bullet-} + \text{Cl}^-$                         | $2.5 \times 10^8 \text{ M}^{-1}\text{s}^{-1}$     | 8      |
| 76 | $\text{HSO}_4^- + \bullet\text{OH} \rightarrow \text{SO}_4^{\bullet-} + \text{H}_2\text{O}$                     | $6.9 \times 10^5 \text{ M}^{-1}\text{s}^{-1}$     | 2      |
| 77 | $\text{SO}_4^{\bullet-} + \text{H}_2\text{O}_2 \rightarrow \text{SO}_4^{2-} + \text{H}^+ + \text{HO}_2^\bullet$ | $1.2 \times 10^7 \text{ M}^{-1}\text{s}^{-1}$     | 9      |
| 78 | $\text{SO}_4^{\bullet-} + \text{HO}_2^\bullet \rightarrow \text{SO}_4^{2-} + \text{H}^+ + \text{O}_2$           | $3.5 \times 10^9 \text{ M}^{-1}\text{s}^{-1}$     | 9      |
| 79 | $\text{Cl}^\bullet + \text{ClO}^- \rightarrow \text{ClO}^\bullet + \text{Cl}^-$                                 | $8.2 \times 10^9 \text{ M}^{-1}\text{s}^{-1}$     | 4      |
| 80 | $\text{Cl}^\bullet + \text{HOCl} \rightarrow \text{ClO}^\bullet + \text{H}^+ + \text{Cl}^-$                     | $3.0 \times 10^9 \text{ M}^{-1}\text{s}^{-1}$     | 10     |
| 81 | $\text{H}^+ + \text{SO}_4^{2-} \rightarrow \text{HSO}_4^-$                                                      | $3.5 \text{ M}^{-1}\text{s}^{-1}$                 | 4      |
| 82 | $\bullet\text{OH} + \text{CA} \rightarrow \text{pro1}$                                                          | $2.8 \times 10^9 \text{ M}^{-1}\text{s}^{-1}$     | 11     |
| 83 | $\text{SO}_4^{\bullet-} + \text{CA} \rightarrow \text{pro2} + \text{SO}_4^{2-}$                                 | $2.3 \times 10^9 \text{ M}^{-1}\text{s}^{-1}$     | 12     |
| 84 | $\text{Cl}_2^{\bullet-} + \text{CA} \rightarrow \text{pro3}$                                                    | $1.41 \times 10^8 \text{ M}^{-1}\text{s}^{-1}$    | 12     |
| 85 | $\text{Cl}^\bullet + \text{CA} \rightarrow \text{pro4}$                                                         | $5.5 \times 10^9 \text{ M}^{-1}\text{s}^{-1}$     | 12     |
| 86 | $\text{ClO}^\bullet + \text{CA} \rightarrow \text{pro5}$                                                        | $1.0 \times 10^6 \text{ M}^{-1}\text{s}^{-1}$     | 11     |
| 87 | $\text{HOCl}^\bullet + \text{CA} \rightarrow \text{pro6}$                                                       | $2.56 \text{ M}^{-1}\text{s}^{-1}$                | fitted |
| 88 | $\text{HOCl} + \text{CA} \rightarrow \text{pro7}$                                                               | $1.45 \times 10^{-1} \text{ M}^{-1}\text{s}^{-1}$ | fitted |
| 89 | $\text{Cl}_2 + \text{CA} \rightarrow \text{pro8}$                                                               | $5.06 \times 10^{-2} \text{ M}^{-1}\text{s}^{-1}$ | fitted |
| 90 | $\text{Co}^{4+} + \text{CA} \rightarrow \text{pro9} + \text{Co}^{2+}$                                           | $2.82 \times 10^{-2} \text{ M}^{-1}\text{s}^{-1}$ | fitted |

---

*fitted* means the reaction rate constant was calculated by Kintecus 6.51.

**Table S2** Major chlorinated by-products of CA in Co<sup>2+</sup>/PMS system.

| NO. | Compound            | Proposed Structure                                                                  | Formula                                         | MW<br>(g/mol) | 0 mM Cl <sup>-</sup> |        | 1 mM Cl <sup>-</sup> |        | 100 mM Cl <sup>-</sup> |        |
|-----|---------------------|-------------------------------------------------------------------------------------|-------------------------------------------------|---------------|----------------------|--------|----------------------|--------|------------------------|--------|
|     |                     |                                                                                     |                                                 |               | 30min                | 120min | 30min                | 120min | 30min                  | 120min |
| 1   | 4-chlorophenol      |    | C <sub>6</sub> H <sub>8</sub> ClO               | 128           | ✓                    | ✓      | ✓                    | ✓      | ✓                      | ✓      |
| 2   | 3-chlorophenol      |    | C <sub>6</sub> H <sub>8</sub> ClO               | 128.56        | ✓                    | ✓      | ✓                    | ✓      |                        |        |
| 3   | 2-chlorophenol      |    | C <sub>6</sub> H <sub>8</sub> ClO               | 128.56        |                      |        |                      | ✓      |                        |        |
| 4   | 2,4-dichloro-phenol |    | C <sub>6</sub> H <sub>4</sub> Cl <sub>2</sub> O | 163           | ✓                    | ✓      | ✓                    | ✓      | ✓                      | ✓      |
| 5   | 2,5-dichloro-phenol |    | C <sub>6</sub> H <sub>4</sub> Cl <sub>2</sub> O | 163           |                      |        |                      | ✓      | ✓                      | ✓      |
| 6   | 2,3-dichloro-phenol |  | C <sub>6</sub> H <sub>4</sub> Cl <sub>2</sub> O | 163           |                      |        |                      | ✓      | ✓                      | ✓      |
| 7   | 3,4-dichloro-phenol |  | C <sub>6</sub> H <sub>4</sub> Cl <sub>2</sub> O | 163           |                      |        |                      |        |                        | ✓      |



|    |                                    |                                                                                     |                     |        |   |   |   |   |   |
|----|------------------------------------|-------------------------------------------------------------------------------------|---------------------|--------|---|---|---|---|---|
| 8  | 1-chloro-4-isopropenyloxy-benzene  | 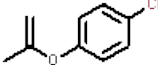   | $C_9H_9ClO$         | 168.62 |   |   |   | ✓ |   |
| 9  | acetic acid-4-chlorophenyl ester   |    | $C_8H_7ClO_2$       | 170.59 | ✓ | ✓ | ✓ |   |   |
| 10 | acetic acid-3-chlorophenyl ester   |    | $C_8H_7ClO_2$       | 170.59 |   | ✓ |   |   |   |
| 11 | 6-chloro-3-methyl-1-indanol        |    | $C_{12}H_{15}ClO_3$ | 182.05 |   | ✓ | ✓ |   |   |
| 12 | 4-tert-butyl-2-chlorophenol        |    | $C_{10}H_{13}ClO$   | 184.66 |   |   | ✓ | ✓ |   |
| 13 | 2,4,6-trichloro-phenol             |   | $C_6H_3Cl_3O$       | 197.45 |   |   | ✓ | ✓ | ✓ |
| 14 | 3-(p-chlorophenoxy) propionic acid |  | $C_9H_9ClO_3$       | 200.62 |   |   | ✓ |   |   |

|    |                                           |                                                                                     |                  |        |  |   |   |   |
|----|-------------------------------------------|-------------------------------------------------------------------------------------|------------------|--------|--|---|---|---|
| 15 | 3-(4-chloro-phenoxy)-<br>propane-1,2-diol | 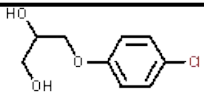   | $C_9H_{11}ClO_3$ | 202.63 |  | ✓ |   |   |
| 16 | o-chlorophenol<br>chloroacetate           |    | $C_8H_6Cl_2O_2$  | 205.04 |  | ✓ |   |   |
| 17 | 3,4-dichloro-phenol acetate               |    | $C_8H_6Cl_2O_2$  | 205.04 |  |   | ✓ |   |
| 18 | 2,4-dichloro-phenol acetate               |    | $C_8H_6Cl_2O_2$  | 205.04 |  |   | ✓ | ✓ |
| 19 | 2,6-dichlorophenol n-propyl<br>ether      |    | $C_9H_{10}Cl_2O$ | 205.08 |  | ✓ |   |   |
| 20 | 2,4-dichlorophenol<br>isopropyl ether     |   | $C_9H_{10}Cl_2O$ | 205.08 |  |   | ✓ | ✓ |
| 21 | 2,6-dichlorophenol<br>isopropyl ether     |  | $C_9H_{10}Cl_2O$ | 205.08 |  |   |   | ✓ |

|    |                                                  |                                                                                     |                     |        |   |   |   |   |
|----|--------------------------------------------------|-------------------------------------------------------------------------------------|---------------------|--------|---|---|---|---|
| 22 | 2-(2,4-dichlorophenoxy)-<br>ethanol              | 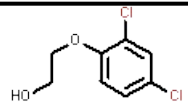   | $C_8H_8Cl_2O_2$     | 207.05 |   |   | ✓ | ✓ |
| 23 | 2-(2-chloro-phenoxy)-2-<br>methyl-propionic acid |    | $C_{10}H_{11}ClO_3$ | 214.65 | ✓ |   |   | ✓ |
| 24 | 2,6-dichloro-4-(1,1-<br>dimethylethyl) phenol    |    | $C_{10}H_{12}Cl_2O$ | 219.11 |   | ✓ |   | ✓ |
| 25 | 3,4-dichlorophenol n-butyl<br>ether              |    | $C_{10}H_{12}Cl_2O$ | 219.11 |   |   | ✓ |   |
| 26 | 2,4-dichlorophenol tert-<br>butyl ether          |    | $C_{10}H_{12}Cl_2O$ | 219.11 |   | ✓ | ✓ | ✓ |
| 27 | 2,3-dichlorophenol n-butyl<br>ether              |   | $C_{10}H_{12}Cl_2O$ | 219.11 |   |   |   | ✓ |
| 28 | 2,4-dichlorophenol tert-<br>butyl ether          |  | $C_{10}H_{12}Cl_2O$ | 219.11 |   | ✓ | ✓ | ✓ |

|    |                                                           |                                                                                     |                       |        |   |   |   |   |   |   |   |
|----|-----------------------------------------------------------|-------------------------------------------------------------------------------------|-----------------------|--------|---|---|---|---|---|---|---|
| 29 | 2,6-dichlorophenol n-butyl ether                          | 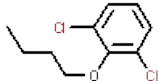   | $C_{10}H_{12}Cl_2O$   | 219.11 |   |   |   |   |   |   | ✓ |
| 30 | 2-(4-chlorophenoxy)-2-methyl- propanoic acid methyl ester |    | $C_{11}H_{13}ClO_3$   | 228.67 | ✓ | ✓ | ✓ | ✓ | ✓ | ✓ | ✓ |
| 31 | butyric acid 2,5-dichloro-phenyl ester                    |    | $C_{10}H_{10}Cl_2O_2$ | 233.09 |   |   |   |   |   |   | ✓ |
| 32 | 2-(2,4-dichloro-phenoxy)-propionic acid                   |    | $C_9H_8Cl_2O_3$       | 235.06 |   | ✓ |   |   | ✓ | ✓ |   |
| 33 | 4-(2,4-dichlorophenoxy)-butanoic acid                     |   | $C_{10}H_{10}Cl_2O_3$ | 249.09 |   | ✓ |   | ✓ | ✓ |   | ✓ |
| 34 | oxalic acid 4-chlorophenyl nonyl ester                    |  | $C_{17}H_{23}ClO_4$   | 326.82 |   |   |   | ✓ |   |   |   |

## References

- 1 M. G. Antoniou, A. Armah and D. D. Dionysiou, *Appl. Catal. B. Environ.*, 2010, **96**, 290-298.
- 2 Y.-H. Guan, J. Ma, X.-C. Li, J.-Y. Fang and L.-W. Chen, *Environ. Sci. Technol.*, 2011, **45**, 9308-9314.
- 3 X.-Y. Yu, Z.-C. Bao and J. R. Barker, *J. Phys. Chem. A.*, 2004, **108**, 295-308.
- 4 J. E. Grebel, J. J. Pignatello and W. A. Mitch, *Environ. Sci. Technol.*, 2010, **44**, 6822-6828.
- 5 J. Kiwi, A. Lopez and V. Nadtochenko, *Environ. Sci. Technol.*, 2000, **34**, 2162-2168.
- 6 C. Liang, Z.-S. Wang and N. Mohanty, *Sci. Total. Environ.*, 2006, **370**, 271-277.
- 7 W. J. McElroy, *J. Phys. Chem.*, 1990, **94**, 2435-2441.
- 8 R. E. Huie, C. L. Clifton and P. Neta, *Int. J. Radiat. Appl. Instrum. Radiat. Phys. Chem.*, 1991, **38**, 477-481.
- 9 J. De Laat, G. T. Le and B. Legube, *Chemosphere*, 2004, **55**, 715-723.
- 10 P. Neta, R. E. Huie and A. B. Ross, *J. Phys. Chem. Ref. Data.*, 1988, **17**, 1027-1284.
- 11 W. Qin, Z. Lin, H. Dong, X. Yuan, Z. Qiang, S. Liu and D. Xia, *Water Res.*, 2020, **186**, 116336.
- 12 Y. Lei, S. Cheng, N. Luo, X. Yang and T. An, *Environ. Sci. Technol.*, 2019, **53**, 11170-11182.
